# Supplementary material
Source: Research Square preprint supplement (doi:10.21203/rs.3.rs-9108777/v1)
Supplement: Supplementary file 2 [file fe4889e43a9220a515032708.xlsx]

## Sheet: A. Cohort information
Sample ID	Age	Sex (chromosomal)	Phenotype	conventional karyotype	moleculair karyotype	FMR1	Exome sequencing	short read genome sequencing
P0	3	F	intra uterine growth retardation, failure to thrive, hearing loss, short stature, asymetry, small mouth, upslanting eyes, skin anomaly, developmental delay		yes		yes
P0M	31	F
P0V	30	M
P1	9	M	short stature, atrio-ventricular septal defect, developmental delay, aneurysmal bone cyst, velopharyngeal insufficiency		yes		yes	yes
P1M	43	F
P1V	41	M
P2	7	M	severe intellectual disability, spastic paraplegia, vermis hypoplasia, periventricular leukomalacia		yes		yes
P2B	10	M	severe intellectual disability, spastic paraplegia, vermis hypoplasia, periventricular leukomalacia		yes		yes
P2M	31	V
P2V	33	M
P3	6	F	developmental delay, language developmental delay, epicanthus, uplansting palpebral fissures, hypopigmenation, nevus flammeus		yes	yes	yes
P3M	41	V
P3V	38	M
P4	25	M	craniofacial dysplasia, cleft lip and palate, blepharophimosis, hernia diaphragmatica, syndactyly, thumb hypoplasia, retrognatia	yes	yes			yes
P4M	62	F
P4V	50	M
P5	21	F	severe intellectual disability, microcephaly, epicanthus, strabismus, prominent teeths, axial hypotonia, spasticity, head shaking, scoliosis	yes	yes		yes
P5M	48	F
P5V	51	M
P6	6	F	severe developmental delay, severe hypotonia, cerebral bleeding, vermis dysplasia, ventriculomegaly		yes			yes
P6M	35	F
P6V	36	M
P7	27	F	moderate intellectual disability, hypermetropia, relative macrocrania, hypotonia	yes	yes	yes	yes
P7M	65	F
P7V	60	M
P8	9	F	corpus callosum agenesis, autism, dyspraxia, hypertrichosis		yes		yes
P8M	41	F
P8V	47	M
P9	2	M	neonatal hypertonia, microcephaly, laryngomalacia, chorioretinal coloboma, corpus callosum dysplasia, developmental delay		yes		yes
P9M	28	F
P9V	34	M
P10	12	M	severe intellectual disability, coloboma, microcephaly, epilepsy, ptosis	yes	yes			yes
P10M	41	F
P10V	42	M
P11	2	F	hypotonia, developmental delay, neonatal cholestasis, ventricular septal defect, anisocoria, broad nasal bridge		yes		yes
P11M	37	F
P11V	42	M
P12	12	F	developmental delay, proteinuria, ventricular septal defect, lymphoedema		yes		yes
P12M	51	F
P12V	54	M
P14	8	M	intra uterine growth retardation, bilateral cleft lip and palate, polydactyly, thumb duplication, microcephaly, hypogammaglobulinemia		yes			yes
P14M	35	F
P14V	40	M
P15	2	M	hypoplasia of the radius, hypoplasia of the ulna, hand agenesis, aplasia of the 3rd toe		yes			yes
P15M	30	F
P15V	33	M
P16	5	M	developmental delay, hypotonia, preauricular tag, hearing loss, polydactyly, epilepsy, cryptorchidism, hirschsprung, immunoglobulin deficiency		yes		yes
P16M	33	F
P16V	32	M
P17	15	F	global developmental delay, autism, epilepsy, hyperventilation		yes		yes
P17M	53	F
P17V	48	M
P18	17	M	polyhydramnios, hypotonia, neonatal feeding difficulties, motor developmental delay, language developmental delay, atrial septal defect, macroglossia, hypospadias, broad first ray, moderate intellectual disability	yes	yes		yes
P18M	50	F
P18V	47	M
P19	12	M	jejunal atresia, atrial septal defect, cryptorchidism, hydronephrosis, cholestasis, hydrocephaly	yes	yes		yes
P19B	9	M	jejunal atresia, hydrocephaly		yes		yes
P19M	40	F
P19V	42	M
P20	2	F	intrauterine growth retardation, atrial septal defect, epilepsy, hypotonia		yes		yes
P20M	39	F
P20V	37	M
P21	16	F	severe developmental delay, epilepsy, retinal dysfunction, corpus callosum agenesis, microcephaly, scoliosis, polymicrogyria	yes	yes		yes
P21M	48	F
P21V	51	M
P22	13	F	intrauterine growth retardation, developmental delay, epilepsy, microcephaly, coloboma		yes		yes
P22M	40	F
P22V	41	M
P23	18	M	developmental delay, corpus callosum agenesis, cryptorchidism, intellectual disability, broad thumbs, atopic dermatitis	yes	yes		yes
P23M	44	F
P23V	43	M
P24	8	F	developmental delay, intellectual disability, short stature, polymicrogyria, epicanthus		yes		yes
P24M	45	F
P24V	53	M
P25	12	M	scoliosis, hydrocephaly, motor developmental delay, autism, dyslexia, developmental coordination disorder, ptosis, low-set ears, broad neck		yes		yes
P25M	unknown	F
P25V	unknown	M
P26	35	M	moderate intellectual disability, autism, high myopia, macrocephaly	yes	yes	yes	yes
P26M	59	F
P26V	62	M
P27	18	F	developmental delay, moderate intellectual disability, relative macrocephaly	yes	yes	yes	yes
P27M	48	F
P27V	49	M
P28	3	F	motor developmental delay, speech developmental delay, global developmental delay, short stature, epicanthus, long filtrum, tented upper lip	yes	yes	yes	yes
P28M	33	F
P28V	35	M

## Sheet: B. Wet lab
Sample ID	Tissue	DNA extraction kit	Library Prep	reads generated (M)	Basecalled bases (Gb) - Guppy	N50 (kb)
P0	muscle fibroblasts	Bionano Prep SP DNA isolation	ULK001	4.38	82.5	59.26
P0M	blood	DNA extraction facility	LSK-110	10.72	89.77	22.73
P0V	blood	DNA extraction facility	LSK-110	22.17	106.26	19.14
P1	blood	Promega wizard (HMW) DNA extraction	LSK-114	15.19	130.75	18.49
P1M	blood	Promega wizard (HMW) DNA extraction	LSK-114	10.05	73.19	28.73
P1V	blood	Promega wizard (HMW) DNA extraction	LSK-114	16.16	113.98	15.34
P2	blood	Promega wizard (HMW) DNA extraction	LSK-110	3.59	75.69	52.03
P2B	blood	Promega wizard (HMW) DNA extraction	LSK-110	8.1	78.14	26.14
P2M	blood	Promega wizard (HMW) DNA extraction	LSK-110	9.44	104.78	40.47
P2V	blood	Promega wizard (HMW) DNA extraction	LSK-110	25.24	115.42	9.67
P3	blood	Promega wizard (HMW) DNA extraction	LSK-110	3.48	64.99	57.08
P3M	blood	Promega wizard (HMW) DNA extraction	LSK-110	5.38	86.82	51.71
P3V	blood	Promega wizard (HMW) DNA extraction	LSK-110	4.76	78.7	49.68
P4	blood	Promega wizard (HMW) DNA extraction	LSK-110	4.62	73.27	47.37
P4M	blood	Promega wizard (HMW) DNA extraction	LSK-110	11.15	118.2	34.59
P4V	blood	Promega wizard (HMW) DNA extraction	LSK-110	19.44	83.35	13.95
P5	blood	Promega wizard (HMW) DNA extraction	LSK-110	3.95	64.6	48.97
P5M	blood	Promega wizard (HMW) DNA extraction	LSK-110	4.56	81.84	55.51
P5V	blood	Promega wizard (HMW) DNA extraction	LSK-110	2.68	40.75	48.68
P6	blood	Promega wizard (HMW) DNA extraction	LSK-110	5.31	69.99	34.42
P6M	blood	Promega wizard (HMW) DNA extraction	LSK-110	2.9	48.69	44.69
P6V	blood	Promega wizard (HMW) DNA extraction	LSK-110	18.29	145.35	25.19
P7	blood	Promega wizard (HMW) DNA extraction	LSK-110	3.19	63.87	62.02
P7M	blood	Promega wizard (HMW) DNA extraction	LSK-110	3.84	62.24	55.14
P7V	blood	Promega wizard (HMW) DNA extraction	LSK-110	2947	54.79	61.8
P8	blood	Promega wizard (HMW) DNA extraction	LSK-110	4.37	76.62	51
P8M	blood	Promega wizard (HMW) DNA extraction	LSK-110	6.58	66.47	36.95
P8V	blood	Promega wizard (HMW) DNA extraction	LSK-110	4.34	62.38	51.47
P9	blood	Promega wizard (HMW) DNA extraction	LSK-110	2.62	60.24	64.37
P9M	blood	NEB Monarch + Promega wizard HMW DNA extraction	LSK-110	3.47	79.5	62.98
P9V	blood	Promega wizard (HMW) DNA extraction	LSK-110	1712	38.47	78.44
P10	blood	NEB Monarch HMW DNA extraction	LSK-110	2.95	63.98	66.58
P10M	blood	NEB Monarch HMW DNA extraction	LSK-110	3.73	64.21	77.79
P10V	blood	NEB Monarch HMW DNA extraction	LSK-110	3.65	77.86	64.99
P11	blood	NEB Monarch HMW DNA extraction	LSK-110	6.6	100.61	43.62
P11M	blood	NEB Monarch HMW DNA extraction	LSK-110	5.23	82.14	41.95
P11V	blood	NEB Monarch HMW DNA extraction	LSK-110	8.42	107.59	31.59
P12	blood	NEB Monarch HMW DNA extraction	LSK-110	5.21	72.66	41.79
P12M	blood	NEB Monarch HMW DNA extraction	LSK-110	4.36	73.85	46.72
P12V	blood	NEB Monarch HMW DNA extraction	LSK-110	4.72	76.1	42.95
P14	blood	NEB Monarch HMW DNA extraction	LSK-110	5.23	92.06	46.96
P14M	blood	NEB Monarch HMW DNA extraction	LSK-110	4.15	93.05	56.83
P14V	blood	NEB Monarch HMW DNA extraction	LSK-110	4.17	70.03	50.07
P15	blood	NEB Monarch HMW DNA extraction	LSK-110	7.44	104.53	38.83
P15M	blood	NEB Monarch HMW DNA extraction	LSK-110	7.09	115.67	37.61
P15V	blood	NEB Monarch HMW DNA extraction	LSK-110	8.15	137.13	38.41
P16	blood	NEB Monarch HMW DNA extraction	LSK-114	8.6	37.79	9.12
P16	blood	NEB Monarch HMW DNA extraction	LSK114 adapted protocol	1.13	20.07	47.23
P16	blood	NEB Monarch HMW DNA extraction	LSK-114	10.49	44.16	5.88
P16M	blood	NEB Monarch HMW DNA extraction	LSK-114 + needle shearing		31	8.5
P16M	blood	NEB Monarch HMW DNA extraction	LSK114 adapted protocol		78	32.5
P16V	blood	NEB Monarch HMW DNA extraction	LSK114	8.99	37.33	7.78
P16V	blood	NEB Monarch HMW DNA extraction	LSK114 adapted protocol	4.68	69.52	31.4
P17	blood	NEB Monarch HMW DNA extraction	LSK-110	5.41	106.27	53.83
P17M	blood	NEB Monarch HMW DNA extraction	LSK-110	5.49	107.29	53.18
P17V	blood	NEB Monarch HMW DNA extraction	LSK-110	4.63	96.51	55.08
P18	blood	NEB Monarch HMW DNA extraction	LSK-110	4.79	93.18	48.12
P18M	blood	NEB Monarch HMW DNA extraction	LSK-110	5.74	92.62	44.37
P18V	blood	NEB Monarch HMW DNA extraction	LSK-110	4.35	79.12	50.67
P19	blood	NEB Monarch HMW DNA extraction	LSK-114	8.86	102.8	34.63
P19B	blood	NEB Monarch HMW DNA extraction	LSK-114	7.29	96.38	39.42
P19M	blood	NEB Monarch HMW DNA extraction	LSK-114	5.5	60.4	31.12
P19V	blood	NEB Monarch HMW DNA extraction	LSK-114	4.67	57.12	32.27
P20	blood	NEB Monarch HMW DNA extraction	LSK-114	5.76	64.76	24.46
P20M	blood	NEB Monarch HMW DNA extraction	LSK-114	5.57	70.44	30.98
P20V	blood	NEB Monarch HMW DNA extraction	LSK-114	4.29	49.73	28.42
P21	blood	NEB Monarch HMW DNA extraction	LSK-110	30.66	147.73	30.66
P21M	blood	NEB Monarch HMW DNA extraction	LSK-110	6.46	84.04	37.65
P21V	blood	NEB Monarch HMW DNA extraction	LSK-110	7.71	100.38	36.85
P22	blood	NEB Monarch HMW DNA extraction	LSK-110	10.45	141.93	29.91
P22M	blood	NEB Monarch HMW DNA extraction	LSK-110	8.04	124.82	35.57
P22V	blood	NEB Monarch HMW DNA extraction	LSK-110	8.38	133.09	36.73
P23	blood	NEB Monarch HMW DNA extraction	LSK-110	7.35	114.25	37.66
P23M	blood	NEB Monarch HMW DNA extraction	LSK-110	7.61	111.6	31.76
P23V	blood	NEB Monarch HMW DNA extraction	LSK-110	5.62	94.42	39.34
P24	blood	NEB Monarch HMW DNA extraction	LSK-114	10.93	77.51	25.79
P24M	blood	NEB Monarch HMW DNA extraction	LSK-114	5.79	67.9	34.77
P24V	blood	NEB Monarch HMW DNA extraction	LSK-114	9.62	95.21	28.39
P25	blood	NEB Monarch HMW DNA extraction	LSK110	9.03	112.98	30.85
P25M	blood	NEB Monarch HMW DNA extraction	LSK110	4.51	84.78	52.13
P25V	blood	NEB Monarch HMW DNA extraction	LSK110	5.7	96.83	40.34
P26	blood	NEB Monarch HMW DNA extraction	LSK114	6.94	78.99	38.59
P26M	blood	NEB Monarch HMW DNA extraction	LSK114	8.64	79.14	34.28
P26V	blood	NEB Monarch HMW DNA extraction	LSK114	6.5	64.45	36.97
P27	blood	NEB Monarch HMW DNA extraction	LSK114 adapted protocol	3.42	67.52	38.64
P27M	blood	NEB Monarch HMW DNA extraction	LSK114 adapted protocol	2.65	48.95	37.47
P27V	blood	NEB Monarch HMW DNA extraction	LSK114 adapted protocol	2.37	44.75	38.58
P28	blood	NEB Monarch HMW DNA extraction	LSK114 + needle shearing	5.74	79.21	36.34
P28M	blood	NEB Monarch HMW DNA extraction	LSK114 + needle shearing	7.97	112.54	41.44
P28V	blood	NEB Monarch HMW DNA extraction	LSK114 + needle shearing	6.89	87.08	40.21
Average ± Standard Deviation *					86.14 ± 24.69	41.59 ± 13.56
		*excluding P16 trio runs which were interrupted (protocol refinement needed with LSK110>LSK144 transition)

## Sheet: C. Results - confirmation
Study ID	Variant type	Gene	Variant g.	Transcript	Variant c. p.	Inheritance	Variant class	Confirmation
P0	missense	ASH1L	1:155357722 A>G	NM_018489.3	c.6823T>C p.(Cys2275Arg)	de novo	VUS	exome data + Sanger sequencing
P1	splice	COL11A1	1:102984138 C>T	NM_001854.4	c.2556G>A p.(Lys852=)	paternally inherited	VUS	exome data + Sanger sequencing
P2 & B2	missense	LONP1	19:5692073 A>C	NM_004793.4	c.2839T>G p.(Phe947Val)	mat. & pat. Inherited	VUS	exome data + Sanger sequencing
P6	frameshift	TBCK	4:106248282 GATCT>G	NM_001163435.3	c.741_744del p.(Asp248fs)	maternally inherited	likely pathogenic	exome data + Sanger sequencing
	splice	TBCK	4:106248199 T>C	NM_001163435.3	c.782+46A>G	paternally inherited	likely pathogenic	Sanger sequencing on cDNA
P7	missense	OSBP	11:59615319 G>A	NM_002556.3	c.346C>T p.(Leu116Phe)	de novo	VUS	exome data
P8	11.13kb deletion	FBXO11	2:47919650-47929780	NA	NA	de novo	VUS	PCR over breakpoints
P16	missense	SLC6A1	3:11025842 G>A	NM_003042.4	c.919G>A p.(Gly307Arg)	paternally inherited	pathogenic	exome data + Sanger sequencing
P17	nonsense	SHANK3	22:50731148 G>T	NM_001372044.2	c.5257G>T p.(Glu1753*)	de novo	likely pathogenic	Sanger sequencing
P20	frameshift	CRELD1	3:9943425 CA>C	NM_001077415.3	c.959del p.(Gln320fs)	paternally inherited	pathogenic	exome data
	missense	CRELD1	3:9940964 G>A	NM_001077415.3	c.575G>A p.(Cys192Tyr)	maternally inherited	pathogenic	exome data
P21	nonsense	NUSAP1	15:41377281 C>A	NM_016359.5	c.1209C>A p.(Tyr403*)	de novo	pathogenic	exome data
P22	inversion	DYRK1A,…	21:37022957-37467808	NA	NA	de novo	pathogenic	PCR over breakpoints
P23	chromosomal rearrangement	CLIC2,…		NA	NA	maternally inherited	risk factor	PCR over breakpoints, optical genome mapping
P24	non-coding RNA	RNU4-2	12:120291839 T>TA	NR_002750.2	n.64_65insT	de novo	pathogenic	Sanger sequencing
P27	frameshift	SYNGAP1	6:33432684 G>GT, 6:33432688 GGCTTCCTGA>G	NM_006772.3	c.388-1_388insT, c.394_402del	de novo	likely pathogenic	Sanger sequencing
P28	frameshift	SETD5	3:9447103 GAA>G	NM_001080517.3	c.1581_1582del p.(Arg528Lysfs*14)	de novo	likely pathogenic	exome data

## Sheet: D. XCI
Study ID	XCI	AR - 1	AR - 2	RP2 - 1	RP2 - 2	AR - 1	AR - 2	RP2 - 1	RP2 - 2
P0	skewing	2/10	10/11	2/6	10/13	0.2	0.909091	0.333333	0.769231
P0M	not skewing	14/18	7/19	4/12	6/11	0.777778	0.368421	0.333333	0.545455
P0V	not applicable
P1	not applicable
P1M	not skewing	7/15	5/9	3/8	1/4	0.466667	0.555556	0.375	0.25
P1V	not applicable
P2	not applicable
P2B	not applicable
P2M	not skewing	5/9	7/16	6/11	8/12	0.555556	0.4375	0.545455	0.666667
P2V	not applicable
P3	skewing	1/15	9/11	4/13	8/11	0.0666667	0.818182	0.307692	0.727273
P3M	not skewing	6/11	7/17	12/17	4/17	0.545455	0.411765	0.705882	0.235294
P3V	not applicable
P4	not applicable
P4M	not skewing	10/17	12/24	3/17	5/10	0.588235	0.5	0.176471	0.5
P4V	not applicable
P5	not skewing	4/4	8/11	1/3	5/10	1	0.727273	0.333333	0.5
P5M	not skewing	3/11	12/17	6/10	5/15	0.272727	0.705882	0.6	0.333333
P5V	not applicable
P6	not skewing	4/7	3/9	5/8	4/11	0.571429	0.333333	0.625	0.363636
P6M	not skewing	6/15	3/10	1/3	4/7	0.4	0.3	0.333333	0.571429
P6V	not applicable
P7	not skewing	6/12	5/16	3/6	6/9	0.5	0.3125	0.5	0.666667
P7M	not skewing	2/10	5/9	5/9	4/11	0.2	0.555556	0.555556	0.363636
P7V	not applicable
P8	not skewing	7/12	4/10	4/6	6/14	0.583333	0.4	0.666667	0.428571
P8M	not skewing	insufficient coverage	insufficient coverage	6/11	3/12	insufficient coverage	insufficient coverage	0.545455	0.25
P8V	not applicable
P9	not applicable
P9M	skewing	2/12	15/20	14/15	1/20	0.166667	0.75	0.933333	0.05
P9V	not applicable
P10	not applicable
P10M	not skewing	6/14	9/17	2/8	7/10	0.428571	0.529412	0.25	0.7
P10V	not applicable
P11	not skewing	7/13	5/10	6/10	5/13	0.538462	0.5	0.6	0.384615
P11M	close to skewing	9/14	2/6	12/14	2/17	0.642857	0.333333	0.857143	0.117647
P11V	not applicable
P12	skewing	9/9	0/10	2/13	9/13	1	0	0.153846	0.692308
P12M	not skewing	9/11	5/7	6/10	7/17	0.818182	0.714286	0.6	0.411765
P12V	not applicable
P14	not applicable
P14M	not skewing	6/10	5/9	4/6	3/16	0.6	0.555556	0.666667	0.1875
P14V	not applicable
P15	not applicable
P15M	not skewing	4/7	1/2	8/14	3/4	0.571429	0.5	0.571429	0.75
P15V	not applicable
P16	not applicable
P16M	not skewing	4/12	11/18	1/1	2/3	0.333333	0.611111	1	0.666667
P16V	not applicable
P17	not skewing	8/13	1/4	11/20	7/21	0.615385	0.25	0.55	0.333333
P17M	not skewing	9/16	5/15	2/5	9/11	0.5625	0.333333	0.4	0.818182
P17V	not applicable
P18	not applicable
P18M	not skewing	6/9	4/12	8/14	2/7	0.666667	0.333333	0.571429	0.285714
P18V	not applicable
P19	not applicable
P19B	not applicable
P19M	skewing	0/4	2/3	0/5	9/11	0	0.666667	0	0.818182
P19V	not applicable
P20	not skewing	insufficient coverage	insufficient coverage	2/7	4/9	insufficient coverage	insufficient coverage	0.285714	0.444444
P20M	not skewing	4/5	5/12	7/8	4/9	0.8	0.416667	0.875	0.444444
P20V	not applicable
P21	not skewing	9/12	7/13	17/25	8/18	0.75	0.538462	0.68	0.444444
P21M	skewing	7/7	1/4	1/8	7/9	1	0.25	0.125	0.777778
P21V	not applicable
P22	not skewing	7/14	6/12	10/16	8/23	0.5	0.5	0.625	0.347826
P22M	not skewing	8/11	4/15	12/21	9/23	0.727273	0.266667	0.571429	0.391304
P22V	not applicable
P23	not applicable
P23M	not skewing	17/23	4/21	5/15	6/12	0.73913	0.190476	0.333333	0.5
P23V	not applicable
P24	skewing	1/11	14/15	8/9	0/8	0.0909091	0.933333	0.888889	0
P24M	not applicable	2/9	4/10	1/3	4/7	0.222222	0.4	0.333333	0.571429
P24V	not applicable
P25	not applicable
P25M	not skewing	1/2	4/10	10/16	0/6	0.5	0.4	0.625	0
P25V	not applicable
P26	not applicable
P26M	not skewing	8/13	5/12	4/5	8/14	0.615385	0.416667	0.8	0.571429
P26V	not applicable
P27	not skewing	2/6	4/10	3/8	3/11	0.333333	0.4	0.375	0.272727
P27M	not skewing	8/14	3/6	3/10	5/8	0.571429	0.5	0.3	0.625
P27V	not applicable
P28	not skewing	14/23	5/10	5/14	2/15	0.608696	0.5	0.357143	0.133333
P28M	not skewing	7/19	13/19	3/14	10/14	0.368421	0.684211	0.214286	0.714286
P28V	not applicable

## Sheet: legend
A. Cohort information: age, chromosomal sex, phenotype and previous genetic testing performed for included individuals. B. Wet lab : DNA extraction and library prep kit used, as well as output (GB) and read length N50 (kb) of the LRS run. C. Overview of variants of interest and with which independent technology the variants were validated. D. X-chromosome inactivation evaluation using Methylartis…
